# Supplementary material
Source: Research Square preprint supplement (doi:10.21203/rs.3.rs-8838246/v1)
Supplement: Supplementary file 1 [file 31ab437cf6063ba405b1e14c.docx]

**Table 1** Effect of irradiation doses and initial concentrations on removal efficiency percentage of antibiotics in individual synthetic samples

| Antibiotics | Irradiation dose (kGy) |  | Initial concentration (ppm) | | |
| --- | --- | --- | --- | --- | --- |
| 10 | 50 | 100 |
| Enrofloxacin, | 0 | Removal efficiency percentage | (0.0±0.00) c | (0.0±0.00) c | (0.0±0.00) c |
|  | 10 | (97.4 ± 0.05) a | (90.9±0.01) b | (98.9±0.06) a |
|  | 25 | (97.9±0.02) a | (96.2 ± 0.08) a | (99.4 ± 0.01) a |
|  | 50 | (98.7 ± 0.01) a | (97.9±0.04) a | (99.5 ± 0.01) a |
| Erythromycin | 0 | (0.0±0) f | (0.0±0) f | (0.0±0) f |
|  | 10 | (100 ± 0.0) a | (82.3 ± 0.04) d | (64.0 ± 0.02) e |
|  | 25 | (100 ± 0.0) a | (100 ± 0.0) a | (92.4 ± 0.02) c |
|  | 50 | (100 ± 0.0) a | (100 ± 0.0) a | (99.0 ± 0.01) b |
| Sulfamethoxazole | 0 | (0.0±0.00) c | (0.0±0.00) c | (0.0±0.00) c |
|  | 10 | (100 ± 0.0) a | (98.3 ± 0.01) b | (93.2 ± 0.01) b |
|  | 25 | (100 ± 0.0) a | (99.8 ± 0.0) a | (99.9±0.0) a |
|  | 50 | (100 ± 0.0) a | (100 ± 0.0) a | (99.9±0.0) a |
| Oxytetracycline | 0 | (0.0±0) b | (0.0±0) b | (0.0±0) b |
|  | 10 | (100 ± 0.0) a | (100 ± 0.0) a | (100 ± 0.0) a |
|  | 25 | (100 ± 0.0) a | (100 ± 0.0) a | (100 ± 0.0) a |
|  | 50 | (100 ± 0.0) a | (100 ± 0.0) a | (100 ± 0.0) a |

The different letters indicate significant differences (*P*≤0.05).

**TABLE 2:** Effect of irradiation doses and initial concentrations on removal efficiency percentage of antibiotics in combined synthetic samples

| Irradiation Dose (kGy) | Antibiotics |  |  | Initial concentrations | | |
| --- | --- | --- | --- | --- | --- | --- |
|  | 10 ppm | 50 ppm | 100 ppm |
|  | Enrofloxacin | Removal efficiency percentage |  | (0.0 ± 0) a | (0.0 ± 0) a | (0.0 ± 0) a |
| 0 | Erythromycin |  | (0.0 ± 0) a | (0.0 ± 0) a | (0.0 ± 0) a |
|  | Sulfamethoxazole |  | (0.0 ± 0) a | (0.0 ± 0) a | (0.0 ± 0) a |
|  | Oxytetracycline |  | (0.0 ± 0) a | (0.0 ± 0) a | (0.0 ± 0) a |
|  | Enrofloxacin |  | (100 ± 0.0) a | (100 ± 0.0) a | (97.8 ± 0.05) bc |
| 10 | Erythromycin |  | (79.0 ± 0.05) d | (28.7 ± 0.03) e | (8.5 ± 0.08) f |
|  | Sulfamethoxazole |  | (100 ± 0.0) a | (100 ± 0.0) a | (98.7 ± 0.02) b |
|  | Oxytetracycline |  | (100 ± 0.0) a | (100 ± 0.0) a | (100 ± 0.0) a |
|  | Enrofloxacin |  | (100 ± 0.0) a | (100 ± 0.0) a | (99.6 ± 0.86) a |
| 25 | Erythromycin |  | (86.3 ± 0.07) bc | (68.2 ± 0.02) d | (97.9 ± 0.15) b |
|  | Sulfamethoxazole |  | (100 ± 0.0) a | (100 ± 0.0) a | (100 ± 0.0) a |
|  | Oxytetracycline |  | (100 ± 0.0) a | (100 ± 0.0) a | (100 ± 0.0) a |
|  | Enrofloxacin |  | (100 ± 0.0) a | (100 ± 0.0) a | (99.5 ± 0.07) a |
| 50 | Erythromycin |  | (88.7 ± 0.08) c | (87.5 ± 0.04) c | (98.8 ± 0.05) ab |
|  | Sulfamethoxazole |  | (100 ± 0.0) a | (100 ± 0.0) a | (100 ± 0.0) a |
|  | Oxytetracycline |  | (100 ± 0.0) a | (100 ± 0.0) a | (100 ± 0.0) a |

The different letters indicate significant differences (*P*≤0.05).

**TABLE 3:** Effect of irradiation doses and initial concentrations, on removal efficiency percentage in real pharmaceutical wastewater samples

| Irradiation dose (kGy) | Antibiotics | Removal efficiency percentage |
| --- | --- | --- |
|  | Enrofloxacin, | (0.0 ± 0) a |
|  | Erythromycin | (0.0 ± 0) a |
| 0 | Sulfamethoxazole | (0.0 ± 0) a |
|  | Oxytetracycline | (0.0 ± 0) a |
|  | Enrofloxacin, | (57.1 ± 0.0) b |
|  | Erythromycin | (47.8 ± 0.05) a |
| 10 | Sulfamethoxazole | (0.0±0.00) c |
|  | Oxytetracycline | (0.0±0.00) c |
|  | Enrofloxacin, | (88.9 ± 0.0) b |
|  | Erythromycin | (99.03 ± 0.100) a |
| 25 | Sulfamethoxazole | (0.0±0.00) c |
|  | Oxytetracycline | (0.0±0.00) c |
|  | Enrofloxacin, | (97.8 ± 0.0) b |
|  | Erythromycin | (100.0±0.100) a |
| 50 | Sulfamethoxazole | (0.0±0.00) c |
|  | Oxytetracycline | (0.0±0.00) c |

The different letters indicate significant differences (*P*≤0.05).
